# Supplementary material for: Silica nanoparticles catalyse the formation of silica nanocapsules in a surfactant-free emulsion system
Source: Royal Society of Chemistry journal article supplement (doi:10.1039/c5ta06947e), 2015-01-01
Supplement: c5ta06947e1.pdf [file c5ta06947e1.pdf]

## Silica Nanoparticles Catalyse the Formation of Silica Nanocapsules in a Surfactant-Free Emulsion System

Yongliang Zhao,<sup>ab</sup> Zhi Chen,<sup>a</sup> Xiaomin Zhu<sup>\*ab</sup> and Martin Möller<sup>ab</sup>

**Table S1** Recipes for the preparation of silica nanocapsules, where the weight of the aqueous solution of silica nanoparticles is 10 g.

| Run | SiO <sub>2</sub> [g] | PEOS [g] | Oil phase [g]  | pH   | Mean diameter of silica capsules [nm] <sup>[a]</sup> |
|-----|----------------------|----------|----------------|------|------------------------------------------------------|
| 1   | 0.12                 | 0.4      | toluene 0.4    | 9.0  | 310 ± 18 (particle-free capsules)                    |
| 2   | 0                    | 0.4      | toluene 0.4    | 9.0  | -                                                    |
| 3   | 0.015                | 0.4      | toluene 0.4    | 9.0  | -                                                    |
| 4   | 0.03                 | 0.4      | toluene 0.4    | 9.0  | -                                                    |
| 5   | 0.06                 | 0.4      | toluene 0.4    | 9.0  | 412 ± 36 (particle-free capsules)                    |
| 6   | 0.18                 | 0.4      | toluene 0.4    | 9.0  | 378 ± 52 (particle-free capsules)                    |
| 7   | 0.12                 | 0.4      | toluene 0.4    | 1.7  | 1230 ± 110 (particle-free capsules)                  |
| 8   | 0.12                 | 0.4      | toluene 0.4    | 2.3  | 1960 ± 200 (colloidosmes)                            |
| 9   | 0.12                 | 0.4      | toluene 0.4    | 3.0  | 2560 ± 140 (colloidosomes)                           |
| 10  | 0.12                 | 0.4      | toluene 0.4    | 4.3  | -                                                    |
| 11  | 0.12                 | 0.4      | toluene 0.4    | 5.2  | -                                                    |
| 12  | 0.12                 | 0.4      | toluene 0.4    | 7.0  | -                                                    |
| 13  | 0.12                 | 0.4      | toluene 0.4    | 8.3  | -                                                    |
| 14  | 0.12                 | 0.4      | toluene 0.4    | 9.6  | 246 ± 15 (particle-free capsules)                    |
| 15  | 0.12                 | 0.4      | toluene 0.4    | 10.1 | -                                                    |
| 16  | 0.12                 | 0.4      | hexadecane 0.4 | 9.0  | 563 ± 65 (particle-free capsules)                    |

<sup>[a]</sup>The mean capsule diameter is obtained by averaging diameters of 1000 capsules estimated from FE-SEM images.

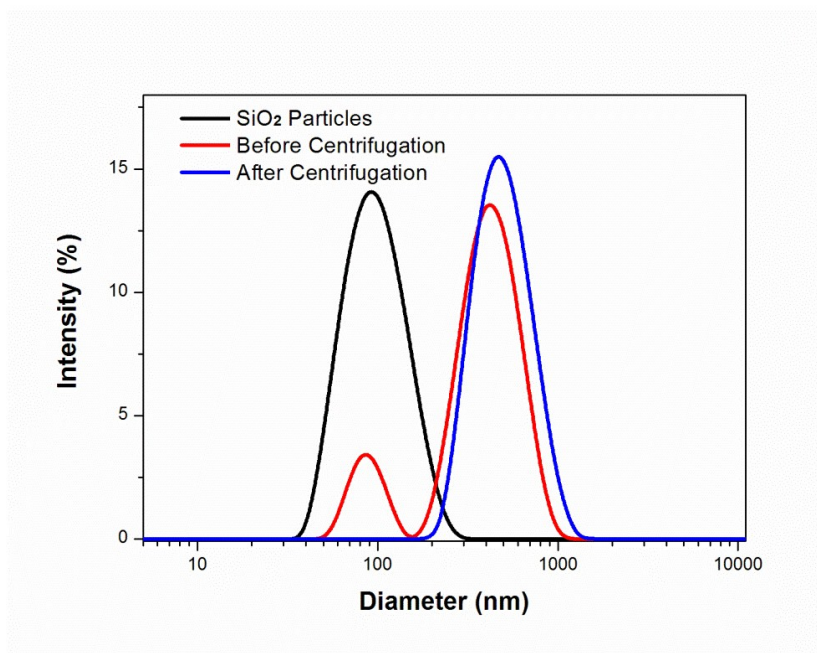

**Fig. S1** Hydrodynamic diameter distributions of silica nanoparticles and nanocapsules before and after centrifugation as measured by dynamic light scattering in water (*cf.* Table S1, Run 1).

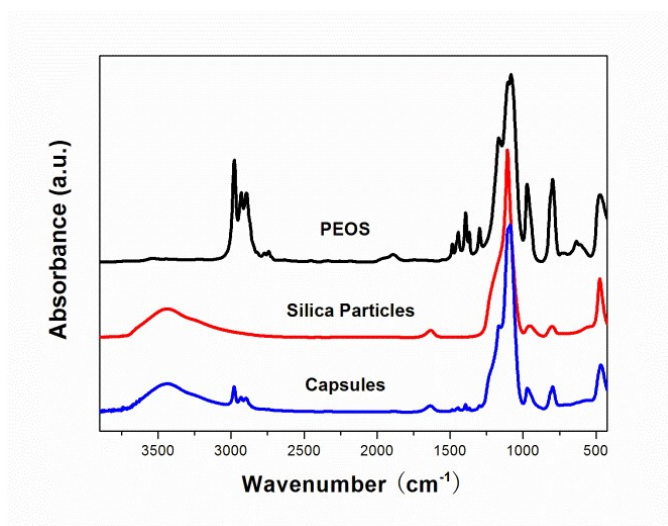

**Fig. S2** FT-IR spectra of PEOS, silica nanoparticles, and dried silica nanocapsules (*cf.* Table S1, Run 1).

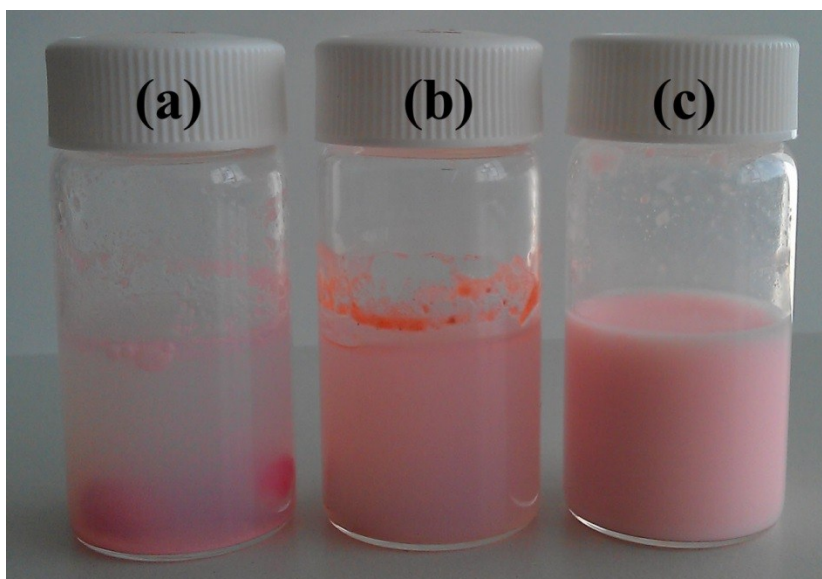

**Fig. S3** Photographs of resulted emulsions after 3 days of sol-gel reaction prepared with (a) no, (b) moderate- (output 2.5), and (c) strong-intensity (output 5.0) ultrasonic emulsification (*cf.* Table S1, Run 1).

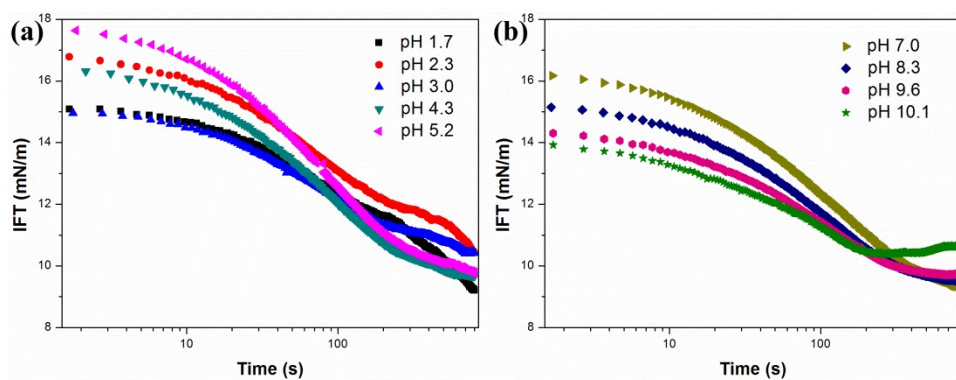

**Fig. S4** IFT between a toluene solution of PEOS (weight ratio of PEOS to toluene is 1:1) and an aqueous phase containing 1.2 wt.-% silica nanoparticles at different pH: (a) under acidic conditions and (b) under neutral and alkaline conditions.

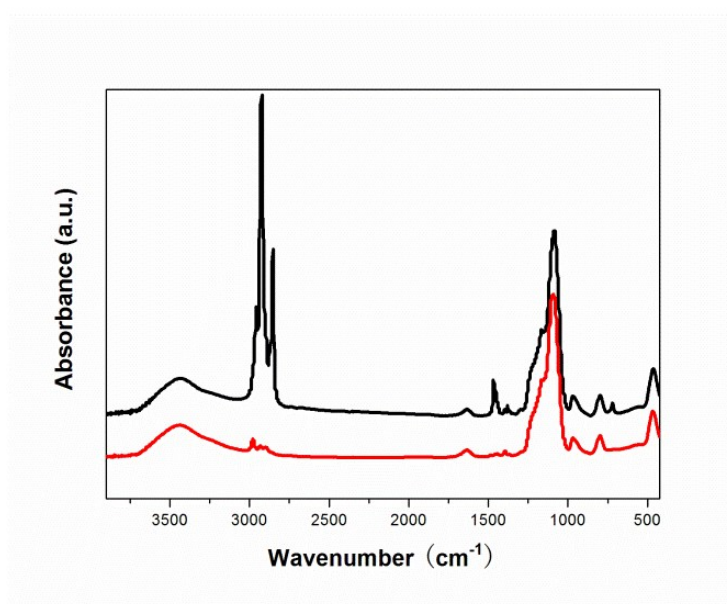

**Fig. S5** FT-IR spectra of air-dried silica nanocapsules containing hexadecane (up) and after the evaporation of hexadecane (down) (*cf.* Table S1, Run 16).
